# Supplementary material for: Hsp90 as a Myokine: Its Association with Systemic Inflammation after Exercise Interventions in Patients with Myositis and Healthy Subjects
Source: MDPI journal article supplement (doi:10.3390/ijms231911451), 2022-09-28
Supplement: s1 [file s1]

## Supplementary Tables

Table S1. Plasma levels of selected cytokines and chemokines in patients with IIM

| Parameter<br>(pg/mL) | Group        | Week 0              | Week 24            | p-value          | Number<br>of<br>subjects |
|----------------------|--------------|---------------------|--------------------|------------------|--------------------------|
| IL-2                 | Intervention | 2.28 (1.62-4.17)    | 3.79 (1.81-8.53)   | 0.119            | 24                       |
|                      | Control      | 3.04 (2.66-5.30)    | 6.53 (3.79-8.55)   | <b>0.022</b>     | 21                       |
| IL-4                 | Intervention | 1.79 (1.11-2.44)    | 2.07 (1.62-2.38)   | 0.989            | 27                       |
|                      | Control      | 2.28 (1.79-3.20)    | 2.33 (1.93-2.84)   | 0.782            | 21                       |
| IL-6                 | Intervention | 0.57 (0.28-1.85)    | 2.27 (0.69-3.01)   | 0.195            | 12                       |
|                      | Control      | 0.86 (0.28-2.70)    | 2.67 (1.10-3.98)   | <b>0.043</b>     | 11                       |
| IL-7                 | Intervention | 20.71 (12.23-26.00) | 6.92 (4.57-11.69)  | <b>0.018</b>     | 9                        |
|                      | Control      | 15.18 (2.59-23.30)  | 9.98 (8.22-14.05)  | 0.367            | 12                       |
| IL-8                 | Intervention | 4.63 (3.07-6.57)    | 5.61 (4.36-7.92)   | 0.479            | 27                       |
|                      | Control      | 7.74 (5.80-11.61)   | 6.86 (6.02-9.05)   | 0.251            | 21                       |
| IL-9                 | Intervention | 100.4 (94.8-127.2)  | 81.6 (68.2-87.6)   | <b>&lt;0.001</b> | 27                       |
|                      | Control      | 111.6 (96.2-120.3)  | 85.3 (68.2-96.3)   | <b>&lt;0.001</b> | 21                       |
| IL-10                | Intervention | 3.03 (1.71-4.37)    | 10.41 (1.58-11.67) | 0.175            | 11                       |
|                      | Control      | 2.37 (1.39-5.04)    | 9.99 (1.35-11.67)  | 0.320            | 11                       |
| MIP-1 $\beta$        | Intervention | 103.1 (93.3-108.8)  | 96.9 (75.8-106.8)  | 0.074            | 27                       |
|                      | Control      | 101.9 (89.5-116.2)  | 89.9 (79.9-103.5)  | <b>0.007</b>     | 21                       |
| MCP-1                | Intervention | 49.4 (34.1-74.7)    | 37.4 (21.2-68.6)   | 0.079            | 26                       |
|                      | Control      | 48.2 (32.2-117.5)   | 32.1 (24.2-39.5)   | <b>0.006</b>     | 21                       |
| RANTES               | Intervention | 9712 (7313-13060)   | 7421 (4124-10446)  | <b>0.001</b>     | 27                       |
|                      | Control      | 9649 (6515-13266)   | 5991 (3992-9703)   | <b>0.007</b>     | 21                       |
| TNF                  | Intervention | 43.8 (38.7-56.4)    | 31.9 (27.0-43.4)   | <b>0.002</b>     | 27                       |
|                      | Control      | 48.8 (46.9-58.3)    | 40.7 (33.3-43.9)   | <b>&lt;0.001</b> | 21                       |

**Acronyms:** Data are presented as median (interquartile range). Data with normal distribution were assessed using paired t-test. Data with non-normal distribution were assessed using Wilcoxon signed rank test. Statistically significant differences ( $p < 0.05$ ) are marked in bold. IIM, idiopathic inflammatory myopathies; IL, interleukin; MCP-1, monocyte chemoattractant protein 1 (CCL2); MIP-1 $\beta$ , macrophage inflammatory protein 1 beta (CCL4); RANTES, regulated on activation/normal T cell expressed and secreted (CCL5); TNF, tumor necrosis factor.

Table S2. Pearson's or Spearman's correlation coefficients of plasma levels of Hsp90 and inflammatory cytokines/chemokines in IIM patients

(intervention group; n=27)

| Parameter       | Hsp90<br>w0 | Hsp90<br>w24-w0 | Hsp90<br>w12-<br>w0 | IL-2<br>w24-<br>w0 | IL-4<br>w24-<br>w0 | IL-6<br>w24-<br>w0 | IL-7<br>w24-<br>w0 | IL-8<br>w24-<br>w0 | IL-9<br>w24-w0 | IL-10<br>w24-<br>w0 | MIP-<br>1 $\beta$<br>w24-<br>w0 | MCP-<br>1<br>w24-<br>w0 | RANTES<br>w24-w0 | TNF<br>w24-<br>w0 |
|-----------------|-------------|-----------------|---------------------|--------------------|--------------------|--------------------|--------------------|--------------------|----------------|---------------------|---------------------------------|-------------------------|------------------|-------------------|
| Hsp90<br>w0     | r           | -0.456          | -0.595              | -                  | -                  | -                  | -                  | -                  | 0.319          | -                   | 0.498                           | -0.054                  | 0.237            | -0.164            |
|                 | p           | <b>0.017</b>    | <b>0.001</b>        | 0.309              | 0.426              | 0.541              | 0.850              | 0.239              | 0.105          | <b>0.043</b>        | <b>0.008</b>                    | 0.792                   | 0.234            | 0.413             |
|                 | n           | 27              | 27                  | 25                 | 27                 | 12                 | 22                 | 27                 | 27             | 16                  | 27                              | 26                      | 27               | 27                |
| Hsp90<br>w24-w0 | r           | -               | 0.620               | 0.368              | 0.224              | 0.739              | 0.169              | 0.058              | -0.242         | 0.447               | -0.295                          | -0.024                  | -0.247           | -0.068            |
|                 | p           | <b>0.017</b>    | <b>&lt;0.001</b>    | 0.071              | 0.262              | <b>0.006</b>       | 0.449              | 0.775              | 0.223          | 0.083               | 0.771                           | 0.906                   | 0.214            | 0.737             |
|                 | n           | 27              | 27                  | 25                 | 27                 | 12                 | 22                 | 27                 | 27             | 16                  | 27                              | 26                      | 27               | 27                |
| Hsp90<br>w12-w0 | r           | -               | 0.620               | 0.434              | 0.144              | 0.494              | -                  | 0.132              | -0.154         | 0.497               | -0.422                          | -0.087                  | -0.308           | 0.083             |
|                 | p           | 0.595           | <b>&lt;0.001</b>    | <b>0.030</b>       | 0.472              | 0.103              | 0.055              | 0.807              | 0.442          | <b>0.050</b>        | <b>0.028</b>                    | 0.671                   | 0.118            | 0.681             |
|                 | n           | 27              | 27                  | 25                 | 27                 | 12                 | 22                 | 27                 | 27             | 16                  | 27                              | 26                      | 27               | 27                |

**Acronyms:** Data with normal distribution were assessed using Pearson's correlation coefficient (r). Data with non-normal distribution were assessed using Spearman's correlation coefficient (r). Statistically significant correlations ( $p < 0.05$ ) are marked in bold. Hsp90, heat shock protein 90; IIM, idiopathic inflammatory myopathies; IL, interleukin; MCP-1, monocyte chemoattractant protein 1 (CCL2); MIP-1 $\beta$ , macrophage inflammatory protein 1 beta (CCL4); n, number of samples analyzed; RANTES, regulated on activation/normal T cell expressed and secreted (CCL5); TNF, tumor necrosis factor; w, week.

**Table S3. Pearson's or Spearman's correlation coefficients of plasma levels of Hsp90 and inflammatory cytokines/chemokines in IIM patients**

(control group; n=23)

| Parameter       | Hsp90<br>w0 | Hsp90<br>w24-<br>w0 | Hsp90<br>w12-<br>w0 | IL-2<br>w24-<br>w0 | IL-4<br>w24-<br>w0 | IL-6<br>w24-<br>w0 | IL-7<br>w24-<br>w0 | IL-8<br>w24-<br>w0 | IL-9<br>w24-<br>w0 | IL-10<br>w24-<br>w0 | MIP-<br>1β<br>w24-<br>w0 | MCP-<br>1<br>w24-<br>w0 | RANTES<br>w24-w0 | TNF<br>w24-<br>w0 |
|-----------------|-------------|---------------------|---------------------|--------------------|--------------------|--------------------|--------------------|--------------------|--------------------|---------------------|--------------------------|-------------------------|------------------|-------------------|
| Hsp90<br>w0     | r           | -0.842              | -0.676              | -0.108             | -0.046             | -0.077             | -0.280             | -0.107             | 0.111              | 0.518               | 0.082                    | -0.184                  | -0.077           | -0.206            |
|                 | p           | <b>&lt;0.001</b>    | <b>&lt;0.001</b>    | 0.625              | 0.835              | 0.812              | 0.245              | 0.628              | 0.615              | <b>0.048</b>        | 0.709                    | 0.401                   | 0.727            | 0.347             |
|                 | n           | 19                  | 22                  | 23                 | 23                 | 12                 | 19                 | 23                 | 23                 | 15                  | 23                       | 23                      | 23               | 23                |
| Hsp90<br>w24-w0 | r           | -0.842              | 0.942               | 0.262              | 0.447              | 0.033              | 0.461              | 0.489              | 0.226              | -0.184              | 0.014                    | 0.400                   | 0.020            | 0.613             |
|                 | p           | <b>&lt;0.001</b>    | <b>&lt;0.001</b>    | 0.278              | 0.054              | 0.932              | 0.062              | <b>0.033</b>       | 0.352              | 0.548               | 0.955                    | 0.089                   | 0.934            | <b>0.005</b>      |
|                 | n           | 19                  | 18                  | 19                 | 19                 | 12                 | 19                 | 19                 | 19                 | 15                  | 19                       | 19                      | 19               | 19                |
| Hsp90<br>w12-w0 | r           | -0.676              | 0.942               | 0.265              | 0.224              | 0.230              | 0.523              | 0.262              | 0.197              | -0.257              | 0.107                    | 0.117                   | -0.021           | 0.352             |
|                 | p           | <b>&lt;0.001</b>    | <b>&lt;0.001</b>    | 0.234              | 0.317              | 0.472              | <b>0.026</b>       | 0.239              | 0.379              | 0.375               | 0.637                    | 0.604                   | 0.924            | 0.108             |
|                 | n           | 22                  | 18                  | 22                 | 22                 | 12                 | 18                 | 22                 | 22                 | 15                  | 22                       | 22                      | 22               | 22                |

**Acronyms:** Data with normal distribution were assessed using Pearson's correlation coefficient (r). Data with non-normal distribution were assessed using Spearman's correlation coefficient (r). Statistically significant correlations (p<0.05) are marked in bold. Hsp90, heat shock protein 90; IIM, idiopathic inflammatory myopathies; IL, interleukin; MCP-1, monocyte chemoattractant protein 1 (CCL2); MIP-1β, macrophage inflammatory protein 1 beta (CCL4); n, number of samples analyzed; RANTES, regulated on activation/normal T cell expressed and secreted (CCL5); TNF, tumor necrosis factor; w, week.

**Table S4. Systemic levels of Hsp90, markers of muscle damage, CRP, and selected cytokines/chemokines in healthy individuals after downhill running**

| Parameter       | Baseline<br>(n=18)  | 30 min<br>(n=18)    | 1 hour<br>(n=18)    | 14 days<br>(n=18)   | p <sup>12</sup> ; p <sup>13</sup> ; p <sup>14</sup> ; p <sup>24</sup> ; p <sup>34</sup> ; p*        |
|-----------------|---------------------|---------------------|---------------------|---------------------|-----------------------------------------------------------------------------------------------------|
| Hsp90, ng/mL    | 5.61 (4.83-8.35)    | 9.06 (6.63-11.23)   | 7.71 (6.84-9.29)    | 4.92 (3.45-7.39)    | <b>0.001; 0.014; 0.499; 0.002; 0.021; 0.005</b>                                                     |
| CK, μkat/L      | 2.14 (1.43-3.39)    | 2.51 (1.84-3.27)    | 2.52 (1.85-3.86)    | 1.96 (1.48-2.63)    | 0.611; 0.146; 0.340; 0.160; <b>0.041</b> ; 0.176                                                    |
| LD, μkat/L      | 2.91 (2.55-3.42)    | 3.57 (3.18-3.93)    | 3.16 (2.71-3.76)    | 2.73 (2.52-3.01)    | <b>0.002</b> ; 0.105; 0.681; <b>&lt;0.001</b> ; 0.064; <b>&lt;0.001</b>                             |
| Myoglobin, μg/L | 52.1 (43.8-58.2)    | 157.9 (138.3-188.2) | 246.4 (194.8-337.5) | 48.2 (44.3-57.4)    | <b>&lt;0.001</b> ; <b>&lt;0.001</b> ; 0.078; <b>&lt;0.001</b> ; <b>&lt;0.001</b> ; <b>&lt;0.001</b> |
| AST, μkat/L     | 0.39 (0.31-0.42)    | 0.39 (0.35-0.44)    | 0.38 (0.31-0.44)    | 0.35 (0.32-0.38)    | 0.406; 0.644; 0.254; <b>0.031</b> ; 0.396; 0.176                                                    |
| ALT, μkat/L     | 0.37 (0.29-0.47)    | 0.35 (0.27-0.47)    | 0.32 (0.23-0.45)    | 0.37 (0.25-0.42)    | 0.832; <b>0.009</b> ; 0.503; 0.603; 0.399; 0.243                                                    |
| CRP, mg/L       | 0.55 (0.31-1.32)    | 0.42 (0.22-0.75)    | 0.35 (0.19-0.56)    | 0.47 (0.26-0.70)    | 0.127; 0.156; 0.074; 0.501; 0.272; 0.227                                                            |
| IL-4, pg/mL †   | 1.29 (0.71-1.74)    | 1.37 (1.05-2.24)    | 1.05 (0.71-1.96)    | 1.05 (0.71-1.67)    | 0.339; 0.635; 0.844; 0.288; 0.128; 0.512                                                            |
| IL-7, pg/mL †   | 3.92 (1.27-6.19)    | 6.19 (3.29-11.7)    | 3.92 (1.27-10.24)   | 7.26 (3.92-12.19)   | 0.362; 0.892; 0.219; 0.641; 0.844; 0.857                                                            |
| IL-9, pg/mL     | 83.5 (52.1-104.3)   | 85.3 (77.0-101.3)   | 78.2 (63.5-97.6)    | 76.8 (67.7-97.3)    | 0.568; 0.638; 0.730; 0.424; 0.784; 0.728                                                            |
| MIP-1β, pg/mL   | 175.5 (107.6-216.7) | 175.2 (143.8-213.4) | 167.5 (115.9-206.6) | 143.0 (130.1-211.9) | 0.706; 0.457; 0.584; 0.392; 0.897; 0.683                                                            |
| MCP-1, pg/mL †  | 9.3 (4.6-13.3)      | 11.0 (9.5-17.3)     | 10.6 (8.7-14.7)     | 7.6 (4.9-9.8)       | 0.064; 0.083; 0.202; <b>0.016</b> ; <b>&lt;0.001</b> ; <b>0.005</b>                                 |
| RANTES, pg/mL   | 3789 (2370-7996)    | 4093 (3230-5896)    | 4129 (2530-5269)    | 3801 (2326-6807)    | 0.601; 0.360; 0.632; 0.631; 0.728; 0.675                                                            |
| TNF, pg/mL      | 26.3 (15.9-29.5)    | 28.9 (23.1-34.2)    | 26.3 (22.5-31.9)    | 28.9 (23.8-37.5)    | 0.078; 1.000; 0.256; 0.817; 0.242; 0.458                                                            |

**Acronyms:** Data are presented as median (interquartile range). Statistically significant differences (p<0.05) are marked in bold: p<sup>12</sup>, baseline vs 30 min; p<sup>13</sup>, baseline vs 1 hour; p<sup>14</sup>, baseline vs 14 days; p<sup>24</sup>, 30 min vs 14 days; p<sup>34</sup>, 1 hour vs 14 days; p\*, repeated measures one-way ANOVA; †, data available only for 17 patients; ALT, alanin aminotransferase; AST, aspartate aminotransferase; CK, creatine kinase; CRP, C-reactive protein; Hsp90, Heat shock protein 90; IL, interleukin; LD, lactate dehydrogenase; MCP-1, monocyte chemoattractant protein 1 (CCL2); MIP-1β, macrophage inflammatory protein 1 beta (CCL4); RANTES, regulated on activation/normal T cell expressed and secreted (CCL5); TNF, tumor necrosis factor.

**Table S5. Pearson's or Spearman's correlation coefficients of plasma levels of Hsp90 with markers of muscle damage and selected cytokines/chemokines in healthy individuals upon downhill running at selected time intervals**

| Interval          |   | CK           | LD           | Myoglobin    | AST    | ALT          | IL-4         | IL-7   | IL-9   | MIP-1 $\beta$ | MCP-1        | RANTES | TNF    |
|-------------------|---|--------------|--------------|--------------|--------|--------------|--------------|--------|--------|---------------|--------------|--------|--------|
| baseline          | r | 0.459        | -0.056       | 0.039        | -0.258 | 0.554        | 0.571        | -0.124 | 0.112  | 0.069         | 0.424        | -0.164 | -0.103 |
|                   | p | <b>0.048</b> | 0.821        | 0.875        | 0.287  | <b>0.014</b> | <b>0.033</b> | 0.700  | 0.658  | 0.786         | 0.102        | 0.515  | 0.686  |
|                   | n | 18           | 18           | 18           | 18     | 18           | 14           | 12     | 18     | 18            | 16           | 18     | 18     |
| 30 min            | r | 0.262        | 0.080        | 0.489        | -0.169 | 0.309        | 0.403        | -0.292 | 0.374  | 0.371         | 0.598        | 0.458  | 0.290  |
|                   | p | 0.278        | 0.745        | <b>0.034</b> | 0.490  | 0.198        | 0.137        | 0.332  | 0.127  | 0.130         | <b>0.011</b> | 0.056  | 0.243  |
|                   | n | 18           | 18           | 18           | 18     | 18           | 15           | 13     | 18     | 18            | 17           | 18     | 18     |
| 1 hour            | r | 0.067        | -0.148       | -0.060       | 0.210  | 0.023        | -0.101       | 0.035  | 0.298  | 0.284         | 0.288        | 0.368  | -0.007 |
|                   | p | 0.786        | 0.544        | 0.808        | 0.387  | 0.925        | 0.768        | 0.929  | 0.229  | 0.254         | 0.262        | 0.132  | 0.977  |
|                   | n | 18           | 18           | 18           | 18     | 18           | 11           | 9      | 18     | 18            | 17           | 18     | 17     |
| 14 days           | r | -0.341       | -0.403       | -0.328       | -0.272 | -0.180       | -0.125       | -0.544 | -0.152 | -0.082        | -0.266       | 0.055  | -0.212 |
|                   | p | 0.153        | 0.087        | 0.171        | 0.261  | 0.462        | 0.714        | 0.084  | 0.560  | 0.755         | 0.302        | 0.829  | 0.415  |
|                   | n | 18           | 18           | 18           | 18     | 18           | 11           | 11     | 17     | 17            | 17           | 18     | 17     |
| 30 min - baseline | r | 0.058        | 0.240        | 0.146        | 0.316  | 0.154        | 0.635        | -0.200 | -0.016 | -0.039        | 0.385        | 0.164  | 0.310  |
|                   | p | 0.814        | 0.323        | 0.552        | 0.188  | 0.529        | <b>0.020</b> | 0.579  | 0.950  | 0.879         | 0.141        | 0.515  | 0.211  |
|                   | n | 18           | 18           | 18           | 18     | 18           | 13           | 9      | 18     | 18            | 16           | 18     | 18     |
| 1 hour - baseline | r | -0.509       | -0.261       | -0.465       | -0.138 | -0.475       | -0.648       | -0.084 | -0.214 | -0.079        | 0.362        | -0.257 | 0.051  |
|                   | p | <b>0.026</b> | 0.280        | <b>0.045</b> | 0.574  | <b>0.040</b> | 0.269        | 0.778  | 0.395  | 0.754         | 0.169        | 0.303  | 0.844  |
|                   | n | 18           | 18           | 18           | 18     | 18           | 11           | 7      | 18     | 18            | 16           | 18     | 17     |
| 30 min - 14 days  | r | -0.050       | 3.5          | 0.249        | -0.125 | 0.010        | 0.685        | -0.045 | -0.297 | -0.317        | 0.353        | -0.162 | 0.019  |
|                   | p | 0.845        | <b>0.048</b> | 0.320        | 0.620  | 0.968        | <b>0.020</b> | 0.916  | 0.247  | 0.215         | 0.165        | 0.521  | 0.943  |
|                   | n | 18           | 18           | 18           | 18     | 18           | 10           | 8      | 18     | 17            | 17           | 18     | 17     |
| 1 hour - 14 days  | r | 0.314        | 0.153        | 0.312        | 0.050  | 0.093        | 0.719        | 0.227  | 0.040  | -0.071        | -0.181       | -0.082 | 0.053  |
|                   | p | 0.190        | 0.533        | 0.193        | 0.839  | 0.704        | 0.069        | 0.665  | 0.880  | 0.787         | 0.486        | 0.748  | 0.845  |
|                   | n | 18           | 18           | 18           | 18     | 18           | 6            | 6      | 17     | 17            | 17           | 18     | 16     |

**Acronyms:** Data with normal distribution were assessed using Pearson's correlation coefficient (r). Data with non-normal distribution were assessed using Spearman's correlation coefficient (r). Statistically significant correlations (p<0.05) are marked in bold. Hsp90, heat shock protein 90; IIM, idiopathic inflammatory myopathies; IL, interleukin; MCP-1, monocyte chemoattractant protein 1 (CCL2); MIP-1 $\beta$ , macrophage inflammatory protein 1 beta (CCL4); n, number of samples with analyzed parameter; RANTES, regulated on activation/normal T cell expressed and secreted (CCL5); TNF, tumor necrosis factor.
